# Supplementary material for: Downregulation of mitochondrial cyclooxygenase-2 inhibits the stemness of nasopharyngeal carcinoma by decreasing the activity of dynamin-related protein 1
Source: PubMed Central journal article supplement — Theranostics. 2017 Mar 23;7(5):1389–406. doi: 10.7150/thno.17647 (PMC5399601; doi:10.7150/thno.17647), 2017-03-23
Supplement: thnov07p1389s1.pdf [file thnov07p1389s1.pdf]

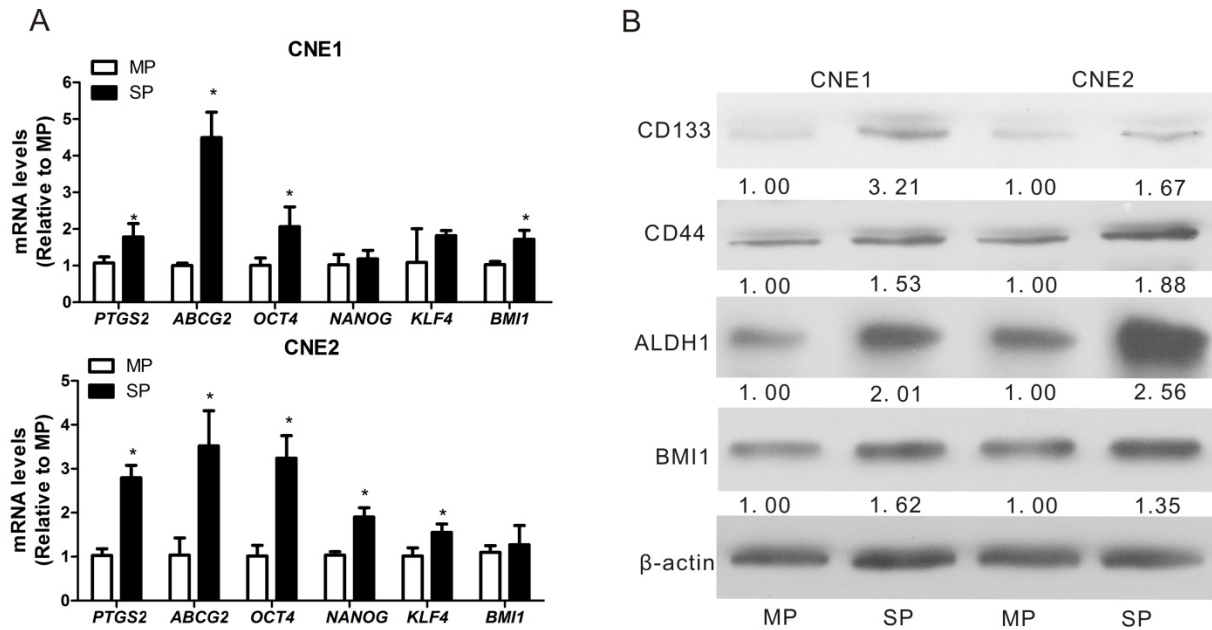

**Fig.S1** (A) The mRNA levels of *PTGS2*, *ABCG2*, *OCT4*, *NANOG*, *KLF4*, and *BMI1* in side population (SP) and main population (MP) cells of CNE1 and CNE2 were detected with the quantitative real-time polymerase chain reaction (qRT-PCR). The target gene expression was normalized to *ACTB*. \*  $P < 0.05$  as compared with MP cells. (B) The protein levels of CD133, CD44, ALDH1, and BMI1 in SP and MP cells of CNE1 and CNE2 as detected by WB.

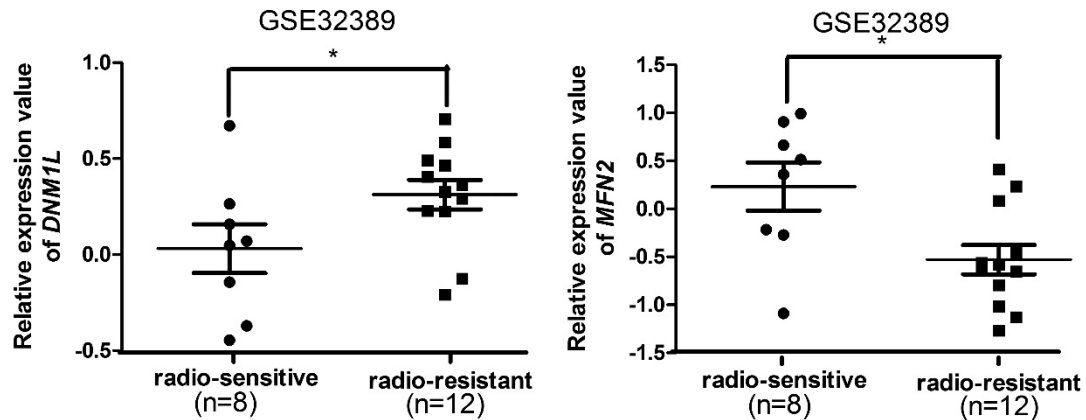

**Fig.S2** *DNMT1L* and *MFN2* expression levels in tumor tissues from cohorts of radio-sensitive and -resistant. NPC patients were shown by scatter plots. The relative expression values were obtained from NCBI, GEO database (Accession No. GSE32389). The light horizontal lines show the median values. \*  $P < 0.05$  as compared with radio-sensitive group.

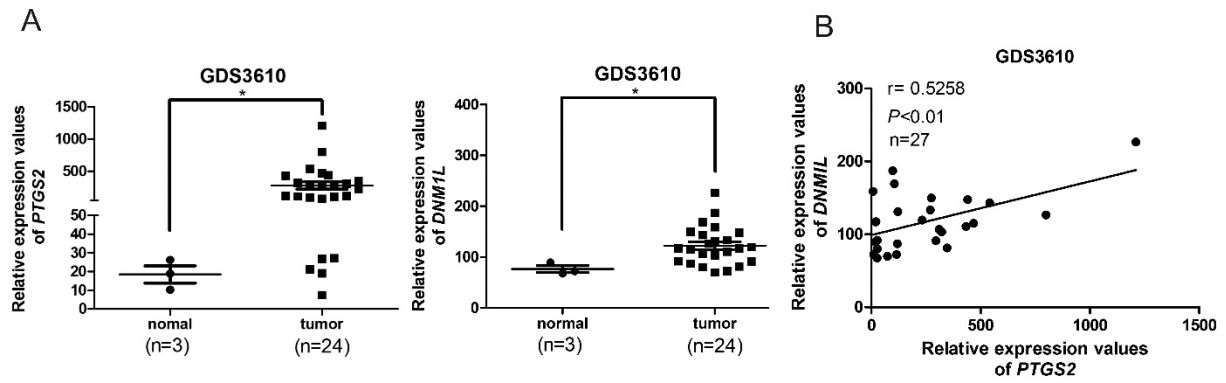

**Fig.S3** (A) *PTGS2* and *DNMT1L* expression levels in cohorts of NPC patients were shown by scatter plots. The relative expression values were obtained from NCBI, GEO database (Assession No. GDS3610). \*  $P < 0.05$  as compared with normal group. (B) Pearson's correlation analysis of *PTGS2* and *DNMT1L* mRNA levels.

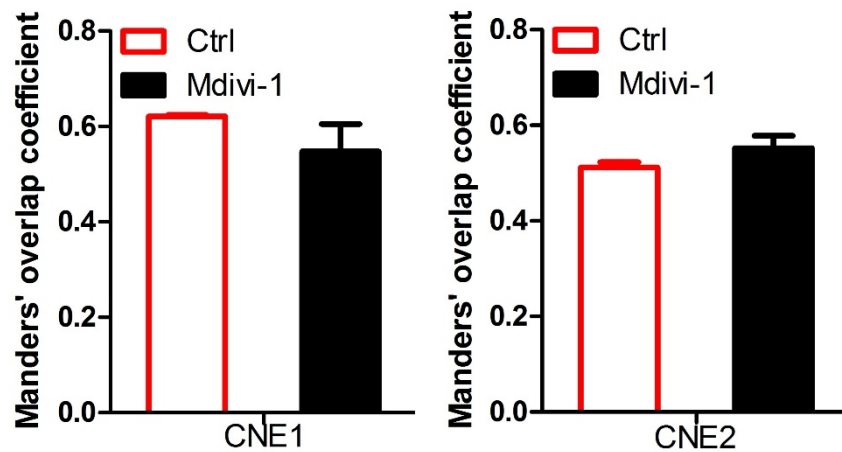

**Fig.S4** CNE1 and CNE2 cells were treated with 20  $\mu$ M Mdivi-1 for 24 h. Manders' overlap coefficients for the co-localization of COX-2 with mitochondria is shown in bar graphs.

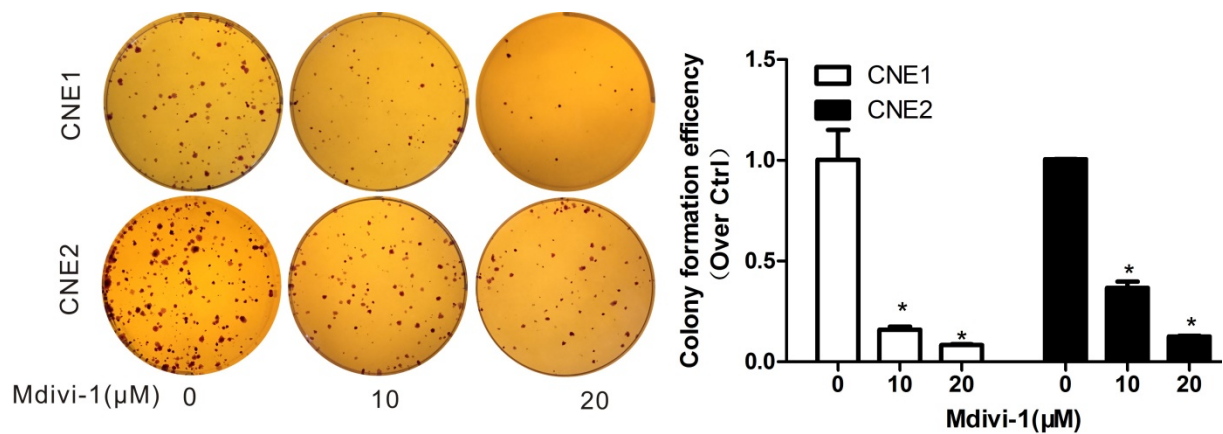

**Fig.S5** The colony formation assay was conducted with treatments of 0, 10, or 20 μM Mdivi-1 for 24 h in CNE1 and CNE2 cells. Representative images of colonies are shown and the right-hand panel is bar chart of colony formation efficiency (CFE). \*  $P < 0.05$  as compared with Ctrl group.

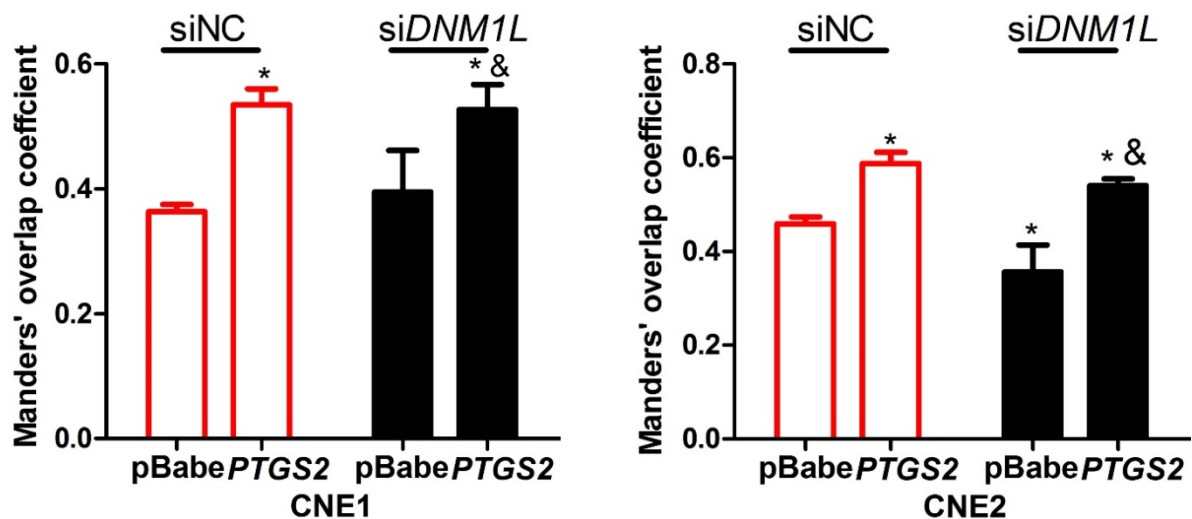

**Fig.S6** CNE1-pBabe, CNE1-*PTGS2*, CNE2-pBabe, and CNE2-*PTGS2* cells were transfected with siNC or si*DNM1L* (50 nM) for 12 h. The co-localization of COX-2 (green) and mitochondria (red) was determined by confocal microscopy. Manders' overlap coefficient for the co-localization of COX-2 with mitochondria is shown in bar graphs. \*  $P < 0.05$  as compared with -pBabe (siNC) cells. &  $P < 0.05$  as compared with -pBabe (si*DNM1L*) cells.

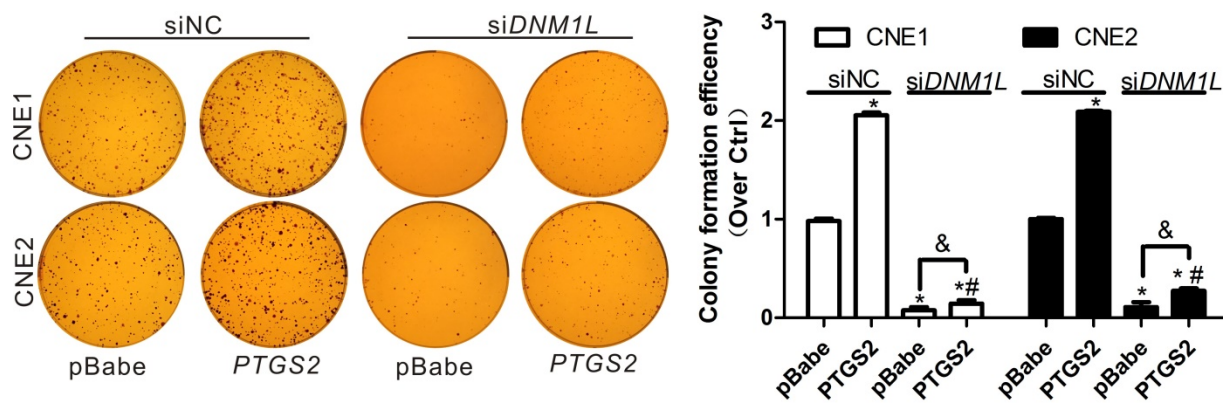

**Fig.S7** CNE1-pBabe, CNE1-PTGS2, CNE2-pBabe and CNE2-PTGS2 cells were transfected with siNC or siDNMIL (50 nM) for 12 h. The colony formation assay was conducted. Representative images of colonies are shown. The right-hand panel is bar chart of colony formation efficiency (CFE). \*  $P < 0.05$  as compared with -pBabe (siNC) cells. #  $P < 0.05$  as compared with -PTGS2 (siNC) cells. &  $P < 0.05$  as compared with -pBabe (siDNMIL) cells.

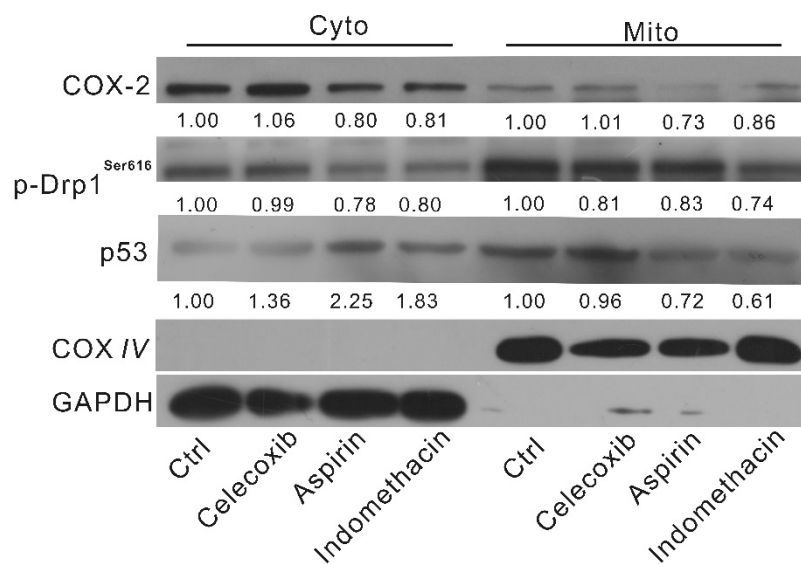

**Fig.S8** CNE2 cells treated with or without 20 μM aspirin, celecoxib or indomethacin for 24 h. Cytosolic (Cyto) and mitochondrial (Mito) fractions were subjected to WB assay. Expressions of COX-2, p-Drp1<sup>Ser616</sup>, p53 are shown.

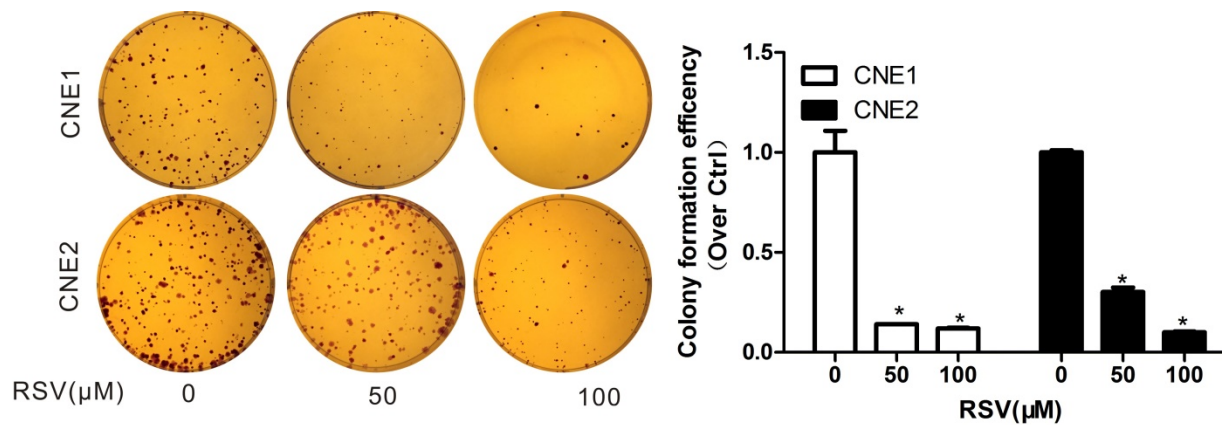

**Fig.S9** Colony formation efficiencies of the CNE1 and CNE2 cells treated with 0, 50, or 100  $\mu\text{M}$  resveratrol (RSV) for 24 h. The right-hand panel is bar chart of colony formation efficiency (CFE). \*  $P < 0.05$  as compared with Ctrl group.

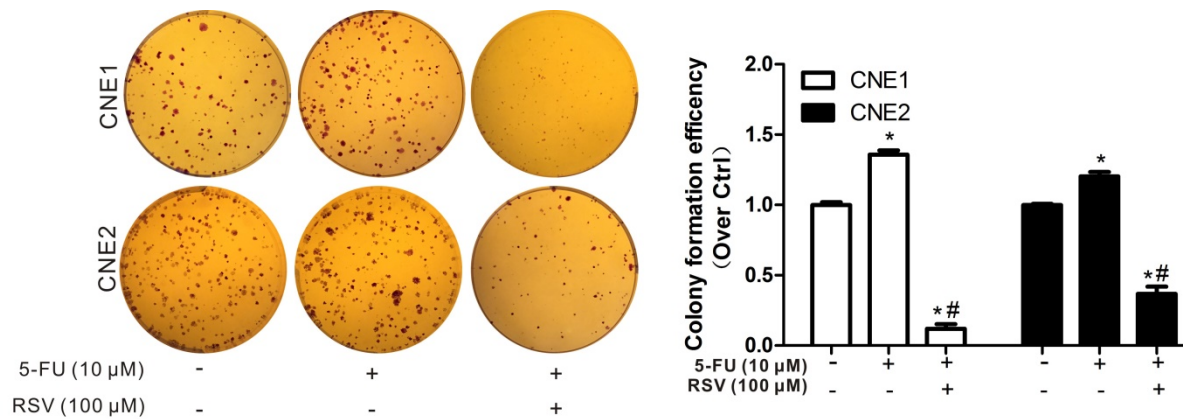

**Fig.S10** Colony formation efficiencies of the CNE1 and CNE2 cells treated with 10  $\mu\text{M}$  5-FU in the presence or absence of 100  $\mu\text{M}$  resveratrol (RSV) for 24 h. The right-hand panel is bar chart of colony formation efficiency (CFE). \*  $P < 0.05$  as compared with Ctrl. #  $P < 0.05$  for combination treatment vs. 5-FU alone.

**Table S1. Primers used for qRT-PCR in this study**

| Gene                    | Forward primer                             | Reverse primer                          |
|-------------------------|--------------------------------------------|-----------------------------------------|
| <i>PTGS2</i>            | 5'-CAG CCA TAC AGC AAA TCC TTG-3'          | 5'-CAA ATG TGA TCT GGA TGT CAA C-3'     |
| <i>ABCG2</i>            | 5'-ATA TTA TCG AAT ATC AAT GGG<br>ATC A-3' | 5'-CAA TGA AAA TCT TCA GGA GAT A-<br>3' |
| <i>OCT4</i>             | 5'- CAC CAG GGC GTG ATG GT -3'             | 5'-ACC ACA CTC GGA CCA CAT C-3'         |
| <i>NANO</i><br><i>G</i> | 5'-AAC CTC AGC TAC AAA CAG GT-3'           | 5'-AGG TCT GGT TGC TCC ACA T-3'         |
| <i>KLF4</i>             | 5'-CTC CAT TAC CAA GAG CTC AT-3'           | 5'-GGT AAG GTT TCT CAC CTG T-3          |
| <i>BM11</i>             | 5'-ACA TTC CTT CTG TAA AAC GTG-3'          | 5'-CAT TGG CAG CAT CAG CAG-3'           |
| <i>ACTB</i>             | 5'-CAC CAG GGC GTG ATG GT-3'               | 5'-CTC AAA CAT GAT CTG GGT CAT-3        |

**Table S2 GEO Datasets used in this study**

| Data source       | Platform                                                                     | Probes/Genes   | NPC<br>Sample<br>No. | Patient<br>Ethnicity | Etiology | Source URL                                                                                                                            |
|-------------------|------------------------------------------------------------------------------|----------------|----------------------|----------------------|----------|---------------------------------------------------------------------------------------------------------------------------------------|
| GEO<br>(GDS3341)  | [HG-<br>U133_Plus_2]<br>Affymetrix<br>Human Genome<br>U133 Plus 2.0<br>Array | 54694/47,000   | 41                   | Asian                | EBV      | <a href="http://www.ncbi.nlm.nih.gov/sites/GDSbrowser?acc=GDS3341">http://www.ncbi.nlm.nih.gov/sites/GDSbrowser?acc=GDS3341</a>       |
| GEO<br>(GDS3610)  | [HG-U133A]<br>Affymetrix<br>Human Genome<br>U133A Array                      | 39,000/ 33,000 | 28                   | Chinese              | EBV      | <a href="http://www.ncbi.nlm.nih.gov/sites/GDSbrowser?acc=GDS3610">http://www.ncbi.nlm.nih.gov/sites/GDSbrowser?acc=GDS3610</a>       |
| GEO<br>(GSE32389) | UGI Human<br>14112 V1.0                                                      | 14112/8220     | 20                   | Chinese              | -        | <a href="http://www.ncbi.nlm.nih.gov/geo/query/acc.cgi?acc=GS E32389">http://www.ncbi.nlm.nih.gov/geo/query/acc.cgi?acc=GS E32389</a> |
